# Supplementary material for: Dementia subtype prediction models constructed by penalized regression methods for multiclass classification using serum microRNA expression data
Source: PubMed Central journal article supplement (PMC8536697; doi:10.1038/s41598-021-00424-1), 2021-10-22
Supplement: 41598_2021_424_MOESM1_ESM.pdf [file 41598_2021_424_MOESM1_ESM.pdf]

## Supplementary Information for

# Dementia subtype prediction models constructed by penalized regression methods for multiclass classification using serum microRNA expression data

Yuya Asanomi<sup>1</sup>, Daichi Shigemizu<sup>1-3\*</sup>, Shintaro Akiyama<sup>1</sup>, Takashi Sakurai<sup>4,5</sup>, Kouichi Ozaki<sup>1,3</sup>, Takahiro Ochiya<sup>6,7</sup>, and Shumpei Niida<sup>1\*</sup>

<sup>1</sup> *Medical Genome Center, National Center for Geriatrics and Gerontology, Obu, Aichi, Japan*

<sup>2</sup> *Department of Medical Science Mathematics, Medical Research Institute, Tokyo Medical and Dental University, Tokyo, Japan*

<sup>3</sup> *RIKEN Center for Integrative Medical Sciences, Yokohama, Japan*

<sup>4</sup> *Center for Comprehensive Care and Research on Memory Disorders, National Center for Geriatrics and Gerontology, Obu, Aichi, Japan*

<sup>5</sup> *Department of Cognition and Behavior Science, Nagoya University Graduate School of Medicine, Nagoya, Aichi, Japan*

<sup>6</sup> *Division of Molecular and Cellular Medicine, Fundamental Innovative Oncology Core Center, National Cancer Center Research Institute, Tokyo, Japan*

<sup>7</sup> *Department of Molecular and Cellular Medicine, Institute of Medical Science, Tokyo Medical University, Tokyo, Japan*

\* Correspondence should be addressed to D.S. ([daichi@ncgg.go.jp](mailto:daichi@ncgg.go.jp)) or S.N. ([sniida@ncgg.go.jp](mailto:sniida@ncgg.go.jp))

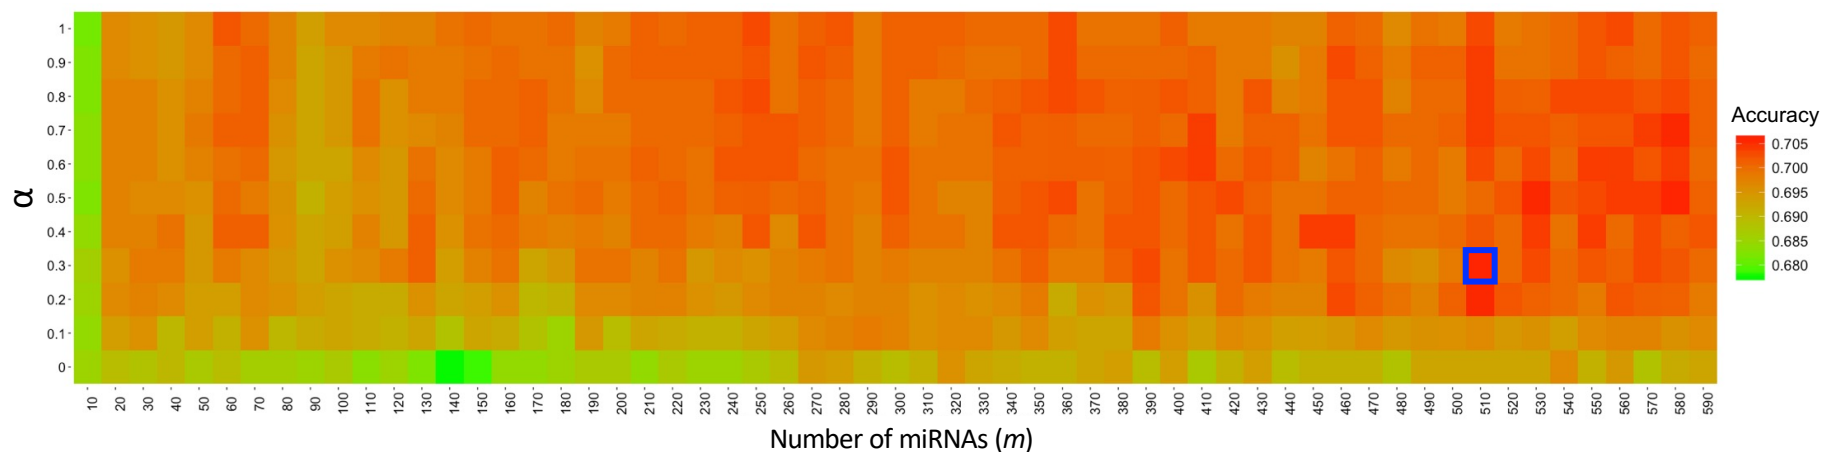

**Supplementary Fig. S1.** Five-fold cross-validation on a discovery set of Dataset 1.

The x-axis shows the number of miRNAs ( $m$ ). The y-axis shows  $\alpha$ , which is used for penalized regression methods. A combination of  $(m, \alpha) = (510, 0.3)$  achieved the highest mean accuracy in the test set (blue rectangle).

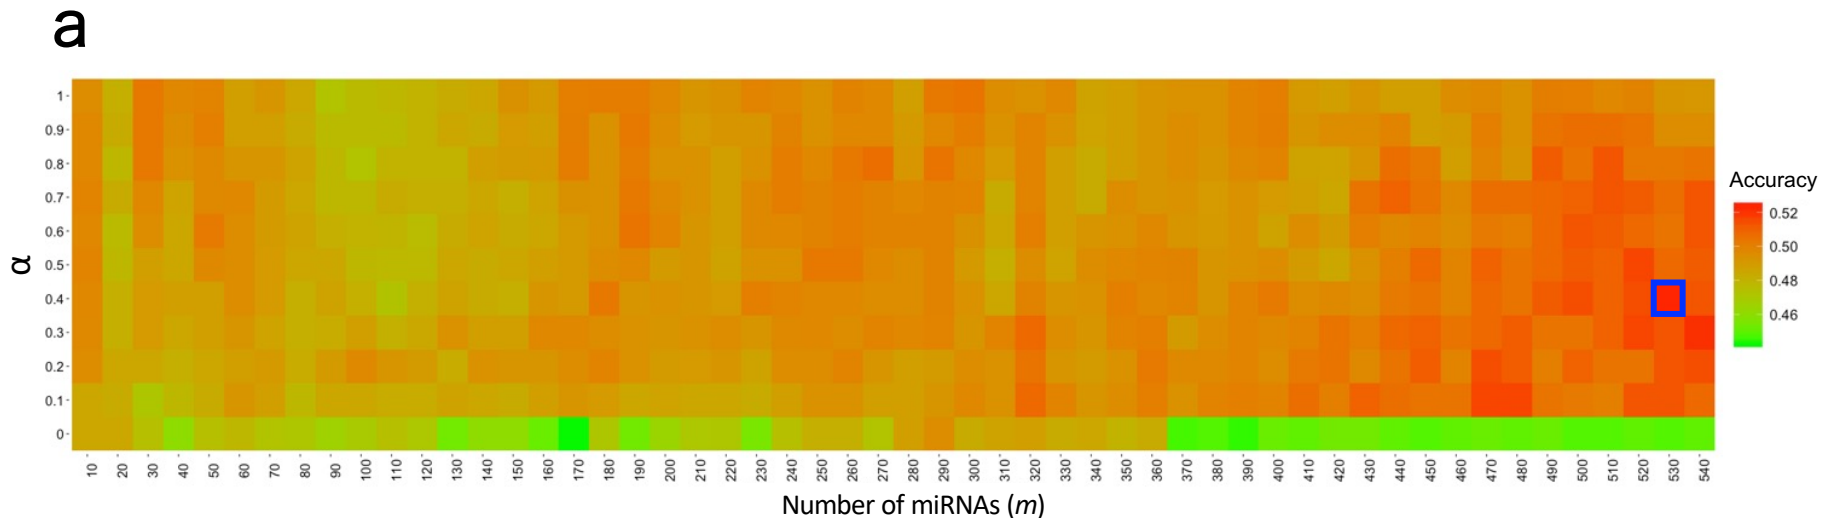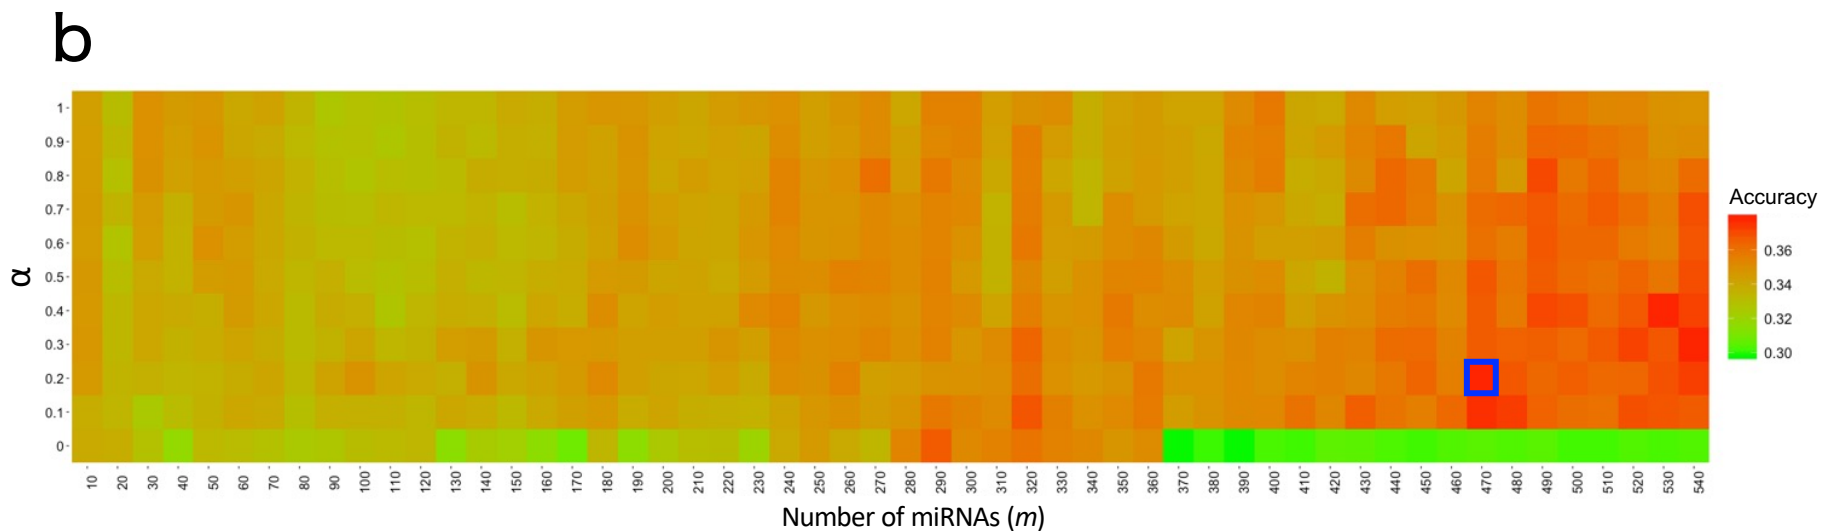

**Supplementary Fig. S2.** Five-fold cross-validation on a discovery set of Dataset 2.

The x-axis shows the number of miRNAs ( $m$ ). The y-axis shows  $\alpha$ , which is used for penalized regression methods. a. A combination of  $(m, \alpha) = (530, 0.4)$  achieved the highest mean accuracy in the test set (blue rectangle). b. A combination of  $(m, \alpha) = (470, 0.2)$  achieved the highest mean of mean accuracies among subtypes in the test set (blue rectangle).

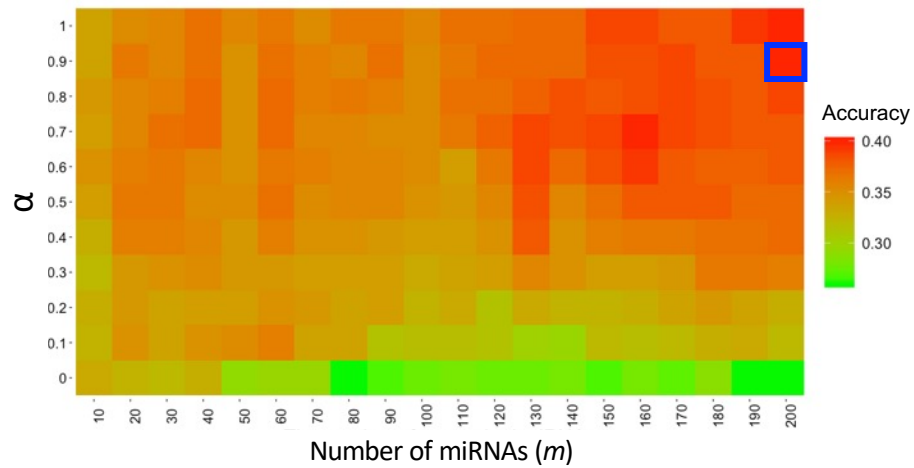

**Supplementary Fig. S3.** Five-fold cross-validation on a discovery set of Dataset 3.

The x-axis shows the number of miRNAs ( $m$ ). The y-axis shows  $\alpha$ , which is used for penalized regression methods. Combinations of  $(m, \alpha) = (200, 0.9)$  and  $(200, 1.0)$  achieved the same highest mean accuracy in the test set (blue rectangle).
